# Supplementary material for: Heavy Metals in Suspended Particulate Matter of the Zhujiang River, Southwest China: Contents, Sources, and Health Risks
Source: PubMed Central journal article supplement (PMC6572230; doi:10.3390/ijerph16101843), 2019-05-24
Supplement: ijerph-16-01843-s001.pdf [file ijerph-16-01843-s001.pdf]

**Table S1.** Pearson correlation matrix of heavy metal(loid)s of the SPM in Zhujiang River.

|    | V              | Cr             | Mn             | Ni             | Cu             | Zn     | As             | Cd     | Pb |
|----|----------------|----------------|----------------|----------------|----------------|--------|----------------|--------|----|
| V  | 1              |                |                |                |                |        |                |        |    |
| Cr | <b>0.741**</b> | 1              |                |                |                |        |                |        |    |
| Mn | 0.345          | <b>0.719**</b> | 1              |                |                |        |                |        |    |
| Ni | 0.513*         | <b>0.841**</b> | <b>0.694**</b> | 1              |                |        |                |        |    |
| Cu | 0.342          | <b>0.679**</b> | 0.492*         | <b>0.697**</b> | 1              |        |                |        |    |
| Zn | -0.154         | -0.182         | 0.089          | -0.031         | -0.160         | 1      |                |        |    |
| As | -0.013         | -0.306         | -0.310         | -0.552**       | -0.263         | 0.060  | 1              |        |    |
| Cd | -0.159         | -0.282         | -0.182         | -0.457*        | -0.136         | 0.037  | <b>0.780**</b> | 1      |    |
| Pb | 0.430*         | <b>0.783**</b> | <b>0.696**</b> | <b>0.692**</b> | <b>0.546**</b> | -0.079 | -0.153         | -0.138 | 1  |

Note: \*, Correlation is significant at the 0.05 level (2-tailed); \*\*, Correlation is remarkably at the 0.01 level (2-tailed).

**Table S2.** Hazard index (HI) calculated results for each site, and reference dose for heavy metal(loid)s in Zhujiang River.

| Site            | V              | Cr             | Mn      | Ni      | Cu      | Zn      | As             | Cd      | Pb      |
|-----------------|----------------|----------------|---------|---------|---------|---------|----------------|---------|---------|
| <b>Children</b> |                |                |         |         |         |         |                |         |         |
| M1              | 3.0E-01        | 2.9E-01        | 3.6E-02 | 6.8E-03 | 3.3E-03 | 2.5E-04 | 3.1E+00        | 4.0E-02 | 8.7E-03 |
| M2              | 1.8E-01        | 2.8E-01        | 5.4E-02 | 4.3E-03 | 4.4E-03 | 2.5E-04 | 3.1E+00        | 4.1E-02 | 7.5E-03 |
| M3              | 2.7E-01        | 3.3E-01        | 5.8E-02 | 5.4E-03 | 4.2E-03 | 4.1E-04 | 3.0E+00        | 4.7E-02 | 1.2E-02 |
| M4              | 1.9E-01        | 2.2E-01        | 8.4E-02 | 5.0E-03 | 3.7E-03 | 4.2E-04 | 3.4E+00        | 3.0E-02 | 8.3E-03 |
| M5              | 2.2E-01        | 2.9E-01        | 8.7E-02 | 5.8E-03 | 4.2E-03 | 2.4E-04 | 3.3E+00        | 4.1E-02 | 1.0E-02 |
| M6              | 3.9E-02        | 4.0E-02        | 9.6E-03 | 1.5E-03 | 1.0E-03 | 9.5E-05 | 2.3E+00        | 3.0E-02 | —       |
| M7              | 1.0E-01        | 2.4E-01        | 9.3E-02 | 4.7E-03 | 2.8E-03 | 5.5E-04 | 4.1E+00        | 7.4E-02 | 1.2E-02 |
| M8              | 1.8E-02        | 7.6E-02        | 3.1E-02 | 1.5E-03 | 8.2E-04 | 2.0E-04 | 2.8E+00        | 5.2E-02 | —       |
| M9              | 2.9E-01        | 2.9E-01        | 7.6E-02 | 4.7E-03 | 2.2E-03 | 2.6E-04 | 2.9E+00        | 3.7E-02 | 8.7E-03 |
| M10             | 4.4E-01        | 3.1E-01        | 7.3E-02 | 5.2E-03 | 2.2E-03 | 2.8E-04 | 2.6E+00        | 4.2E-02 | 7.9E-03 |
| M11             | 3.2E-01        | 3.0E-01        | 6.9E-02 | 3.9E-03 | 2.1E-03 | 2.7E-04 | 2.7E+00        | 3.1E-02 | 1.0E-02 |
| M12             | 2.5E-01        | 2.9E-01        | 6.9E-02 | 4.5E-03 | 2.1E-03 | 2.6E-04 | 3.0E+00        | 3.1E-02 | 7.6E-03 |
| M13             | 2.9E-01        | 3.0E-01        | 7.2E-02 | 4.8E-03 | 2.2E-03 | 3.2E-04 | 2.8E+00        | 4.7E-02 | 7.4E-03 |
| M14             | 2.2E-01        | 2.8E-01        | 5.6E-02 | 4.8E-03 | 2.3E-03 | 6.3E-04 | 3.1E+00        | 3.6E-02 | 4.9E-03 |
| M15             | 2.6E-01        | 2.8E-01        | 7.0E-02 | 5.4E-03 | 2.1E-03 | 3.8E-04 | 3.8E+00        | 3.9E-02 | 6.2E-03 |
| M16             | 2.2E-01        | 3.0E-01        | 8.9E-02 | 5.0E-03 | 3.0E-03 | 4.8E-04 | 4.0E+00        | 7.0E-02 | 1.2E-02 |
| M17             | 2.5E-01        | 2.5E-01        | 7.8E-02 | 3.9E-03 | 2.2E-03 | 2.7E-04 | 3.5E+00        | 4.5E-02 | 1.8E-03 |
| M18             | 3.3E-01        | 2.6E-01        | 5.4E-02 | 4.4E-03 | 2.0E-03 | 2.6E-04 | 3.7E+00        | 2.4E-02 | 8.9E-03 |
| B1              | 2.8E-01        | 1.2E-01        | 1.2E-02 | —       | 1.9E-03 | 2.2E-04 | 8.9E+00        | 1.0E-01 | —       |
| B2              | 3.8E-01        | 4.2E-01        | 8.9E-02 | 7.2E-03 | 5.8E-03 | 2.7E-04 | 9.4E-01        | 2.5E-02 | 8.5E-03 |
| B3              | 1.9E-01        | 1.8E-01        | 5.0E-02 | 4.8E-03 | 3.0E-03 | 1.7E-04 | 1.7E+00        | 4.6E-02 | —       |
| B4              | 1.5E-01        | 8.1E-02        | 4.3E-02 | 2.8E-03 | 1.2E-03 | 1.4E-03 | 3.4E+00        | 4.0E-02 | —       |
| Min             | 1.8E-02        | 4.0E-02        | 9.6E-03 | 1.5E-03 | 8.2E-04 | 9.5E-05 | 9.4E-01        | 2.4E-02 | 1.8E-03 |
| Max             | 4.4E-01        | 4.2E-01        | 9.3E-02 | 7.2E-03 | 5.8E-03 | 1.4E-03 | 8.9E+00        | 1.0E-01 | 1.2E-02 |
| AM              | <b>2.4E-01</b> | <b>2.5E-01</b> | 6.1E-02 | 4.6E-03 | 2.7E-03 | 3.6E-04 | <b>3.3E+00</b> | 4.4E-02 | 8.3E-03 |
| <b>Adults</b>   |                |                |         |         |         |         |                |         |         |
| M1              | 2.3E-01        | 2.2E-01        | 2.7E-02 | 5.1E-03 | 2.4E-03 | 1.9E-04 | 2.3E+00        | 3.0E-02 | 6.5E-03 |
| M2              | 1.3E-01        | 2.1E-01        | 4.0E-02 | 3.2E-03 | 3.3E-03 | 1.8E-04 | 2.3E+00        | 3.0E-02 | 5.6E-03 |
| M3              | 2.0E-01        | 2.5E-01        | 4.3E-02 | 4.0E-03 | 3.1E-03 | 3.0E-04 | 2.2E+00        | 3.5E-02 | 8.6E-03 |
| M4              | 1.4E-01        | 1.7E-01        | 6.3E-02 | 3.7E-03 | 2.7E-03 | 3.1E-04 | 2.6E+00        | 2.3E-02 | 6.2E-03 |
| M5              | 1.6E-01        | 2.1E-01        | 6.5E-02 | 4.3E-03 | 3.1E-03 | 1.8E-04 | 2.4E+00        | 3.1E-02 | 7.5E-03 |
| M6              | 2.9E-02        | 3.0E-02        | 7.1E-03 | 1.2E-03 | 7.7E-04 | 7.0E-05 | 1.7E+00        | 2.2E-02 | —       |
| M7              | 7.8E-02        | 1.8E-01        | 6.9E-02 | 3.5E-03 | 2.1E-03 | 4.1E-04 | 3.1E+00        | 5.5E-02 | 8.8E-03 |
| M8              | 1.3E-02        | 5.7E-02        | 2.3E-02 | 1.1E-03 | 6.1E-04 | 1.5E-04 | 2.1E+00        | 3.9E-02 | —       |
| M9              | 2.1E-01        | 2.2E-01        | 5.6E-02 | 3.5E-03 | 1.6E-03 | 2.0E-04 | 2.2E+00        | 2.8E-02 | 6.5E-03 |
| M10             | 3.3E-01        | 2.3E-01        | 5.4E-02 | 3.9E-03 | 1.6E-03 | 2.1E-04 | 2.0E+00        | 3.2E-02 | 5.9E-03 |
| M11             | 2.4E-01        | 2.2E-01        | 5.1E-02 | 2.9E-03 | 1.6E-03 | 2.0E-04 | 2.0E+00        | 2.3E-02 | 7.6E-03 |
| M12             | 1.8E-01        | 2.2E-01        | 5.1E-02 | 3.4E-03 | 1.6E-03 | 2.0E-04 | 2.2E+00        | 2.3E-02 | 5.7E-03 |

| Site       | V       | Cr      | Mn      | Ni      | Cu      | Zn      | As             | Cd      | Pb      |
|------------|---------|---------|---------|---------|---------|---------|----------------|---------|---------|
| M13        | 2.2E-01 | 2.2E-01 | 5.3E-02 | 3.6E-03 | 1.6E-03 | 2.3E-04 | 2.1E+00        | 3.5E-02 | 5.5E-03 |
| M14        | 1.7E-01 | 2.1E-01 | 4.2E-02 | 3.6E-03 | 1.7E-03 | 4.7E-04 | 2.3E+00        | 2.7E-02 | 3.6E-03 |
| M15        | 2.0E-01 | 2.1E-01 | 5.2E-02 | 4.0E-03 | 1.6E-03 | 2.8E-04 | 2.8E+00        | 2.9E-02 | 4.6E-03 |
| M16        | 1.7E-01 | 2.2E-01 | 6.6E-02 | 3.7E-03 | 2.2E-03 | 3.6E-04 | 3.0E+00        | 5.2E-02 | 8.9E-03 |
| M17        | 1.8E-01 | 1.9E-01 | 5.8E-02 | 2.9E-03 | 1.7E-03 | 2.0E-04 | 2.6E+00        | 3.3E-02 | 1.3E-03 |
| M18        | 2.4E-01 | 2.0E-01 | 4.0E-02 | 3.2E-03 | 1.5E-03 | 1.9E-04 | 2.8E+00        | 1.8E-02 | 6.6E-03 |
| B1         | 2.1E-01 | 8.9E-02 | 8.6E-03 | —       | 1.4E-03 | 1.6E-04 | 6.6E+00        | 7.6E-02 | —       |
| B2         | 2.9E-01 | 3.2E-01 | 6.6E-02 | 5.4E-03 | 4.4E-03 | 2.0E-04 | 7.0E-01        | 1.9E-02 | 6.3E-03 |
| B3         | 1.4E-01 | 1.3E-01 | 3.8E-02 | 3.6E-03 | 2.2E-03 | 1.3E-04 | 1.2E+00        | 3.4E-02 | —       |
| B4         | 1.1E-01 | 6.1E-02 | 3.2E-02 | 2.1E-03 | 8.9E-04 | 1.0E-03 | 2.5E+00        | 3.0E-02 | —       |
| Min        | 1.3E-02 | 3.0E-02 | 7.1E-03 | 1.1E-03 | 6.1E-04 | 7.0E-05 | 7.0E-01        | 1.8E-02 | 1.3E-03 |
| Max        | 3.3E-01 | 3.2E-01 | 6.9E-02 | 5.4E-03 | 4.4E-03 | 1.0E-03 | 6.6E+00        | 7.6E-02 | 8.9E-03 |
| AM         | 1.8E-01 | 1.8E-01 | 4.6E-02 | 3.4E-03 | 2.0E-03 | 2.7E-04 | <b>2.4E+00</b> | 3.3E-02 | 6.2E-03 |
| <b>RfD</b> | 7.0E-05 | 6.0E-05 | 1.8E-03 | 1.0E-03 | 1.9E-03 | 6.0E-02 | 1.2E-04        | 1.0E-05 | 5.3E-04 |

Note: Units in mg kg<sup>-1</sup> day<sup>-1</sup> for RfD; Min, minimum; Max, Maximum; AM, arithmetical mean; RfD, reference dose [1,2]; “—” means HI value is not calculated due to the metal contents in the corresponding SPM sample are below detectable limit.

## References

1. Wu, T.; Bi, X.; Li, Z.; Sun, G.; Feng, X.; Shang, L.; Zhang, H.; He, T.; Chen, J. Contaminations, Sources, and Health Risks of Trace Metal(loid)s in Street Dust of a Small City Impacted by Artisanal Zn Smelting Activities. *International Journal of Environmental Research and Public Health* 2017, 14, 961, doi:10.3390/ijerph14090961.
2. Wan, D.J.; Zhan, C.L.; Yang, G.L.; Liu, X.Q.; Yang, J.S. Preliminary Assessment of Health Risks of Potentially Toxic Elements in Settled Dust over Beijing Urban Area. *International Journal of Environmental Research and Public Health* 2016, 13, doi:10.3390/ijerph13050491.
